# Supplementary material
Source: PubMed Central journal article supplement (PMC7674044)
Supplement: AAC.01432-20-s0001.pdf [file AAC.01432-20-s0001.pdf]

1 **Supplemental Table 1.** Summary list of genus/species of isolates of Gram-negative bacilli  
 2 included in the current study

3

| Family                             | Genus/species                       | No. of isolates |
|------------------------------------|-------------------------------------|-----------------|
| <i>Enterobacterales</i>            | <i>Citrobacter amalonaticus</i>     | 1               |
|                                    | <i>Citrobacter freundii</i>         | 28              |
|                                    | <i>Citrobacter koseri</i>           | 3               |
|                                    | <i>Enterobacter aerogenes</i>       | 13              |
|                                    | <i>Enterobacter asburiae</i>        | 3               |
|                                    | <i>Enterobacter cloacae</i>         | 139             |
|                                    | <i>Enterobacter kobei</i>           | 5               |
|                                    | <i>Escherichia coli</i>             | 69              |
|                                    | <i>Klebsiella oxytoca</i>           | 31              |
|                                    | <i>Klebsiella pneumoniae</i>        | 688             |
|                                    | <i>Serratia marcescens</i>          | 38              |
| <i>Enterobacterales</i> Total      |                                     | 1,018           |
| Non- <i>Enterobacterales</i>       | <i>Burkholderia cepacia</i>         | 3               |
|                                    | <i>Burkholderia</i> , non-speciated | 1               |
|                                    | <i>Pseudomonas aeruginosa</i>       | 262             |
|                                    | <i>Stenotrophomonas maltophilia</i> | 101             |
| Non- <i>Enterobacterales</i> Total |                                     | 367             |
| Grand Total                        |                                     | 1,385           |

4

**Supplemental Table 2.** Demographics of isolates of Gram-negative bacilli included in the current study by geographical region and country

| Geographical region | Country            | No. of sites | No. of isolates | % of total isolates |
|---------------------|--------------------|--------------|-----------------|---------------------|
| Africa              | Kenya              | 1            | 1               | 0.1                 |
|                     | South Africa       | 5            | 11              | 0.8                 |
| Africa total        | 2 countries        | 6            | 12              | 0.9                 |
| Asia                | Japan              | 1            | 1               | 0.1                 |
|                     | Korea, South       | 4            | 6               | 0.4                 |
|                     | Malaysia           | 1            | 3               | 0.2                 |
|                     | Pakistan           | 1            | 11              | 0.8                 |
|                     | Taiwan             | 6            | 26              | 1.9                 |
|                     | Thailand           | 2            | 20              | 1.4                 |
|                     | Vietnam            | 5            | 8               | 0.6                 |
| Asia total          | 7 countries        | 20           | 75              | 5.4                 |
| Europe              | Austria            | 3            | 12              | 0.9                 |
|                     | Belgium            | 5            | 41              | 3                   |
|                     | Croatia            | 2            | 3               | 0.2                 |
|                     | Czech Republic     | 3            | 5               | 0.4                 |
|                     | Denmark            | 1            | 1               | 0.1                 |
|                     | France             | 5            | 6               | 0.4                 |
|                     | Germany            | 7            | 16              | 1.2                 |
|                     | Greece             | 4            | 128             | 9.2                 |
|                     | Hungary            | 3            | 7               | 0.5                 |
|                     | Ireland            | 1            | 2               | 0.1                 |
|                     | Italy              | 16           | 209             | 15.1                |
|                     | Lithuania          | 1            | 2               | 0.1                 |
|                     | Netherlands        | 1            | 2               | 0.1                 |
|                     | Poland             | 3            | 9               | 0.6                 |
|                     | Portugal           | 7            | 25              | 1.8                 |
|                     | Romania            | 5            | 56              | 4                   |
|                     | Russia             | 9            | 58              | 4.2                 |
|                     | Serbia             | 2            | 22              | 1.6                 |
|                     | Slovenia           | 1            | 1               | 0.1                 |
|                     | Spain              | 15           | 56              | 4                   |
|                     | Turkey             | 5            | 54              | 3.9                 |
|                     | United Kingdom     | 3            | 11              | 0.8                 |
| Europe total        | 22 countries       | 102          | 726             | 52.4                |
| Latin America       | Argentina          | 3            | 50              | 3.6                 |
|                     | Brazil             | 8            | 78              | 5.6                 |
|                     | Chile              | 3            | 34              | 2.5                 |
|                     | Colombia           | 6            | 68              | 4.9                 |
|                     | Dominican Republic | 1            | 4               | 0.3                 |
|                     | Guatemala          | 2            | 29              | 2.1                 |
|                     | Mexico             | 7            | 47              | 3.4                 |
|                     | Panama             | 1            | 6               | 0.4                 |
|                     | Puerto Rico        | 1            | 27              | 1.9                 |
|                     | Venezuela          | 4            | 27              | 1.9                 |
| Latin America total | 10 countries       | 36           | 370             | 26.7                |
| Middle East         | Georgia            | 1            | 2               | 0.1                 |
|                     | Jordan             | 1            | 1               | 0.1                 |
|                     | Kuwait             | 1            | 8               | 0.6                 |
| Middle East total   | 3 countries        | 3            | 11              | 0.8                 |
| North America       | Canada             | 6            | 35              | 2.5                 |
|                     | United States      | 21           | 107             | 7.7                 |
| North America total | 2 countries        | 27           | 142             | 10.3                |
| South Pacific       | Australia          | 4            | 14              | 1                   |
|                     | New Zealand        | 2            | 5               | 0.4                 |
|                     | Philippines        | 4            | 30              | 2.2                 |
| South Pacific total | 3 countries        | 10           | 49              | 3.5                 |
| Grand total         | 49 countries       | 204          | 1,385           | 100                 |
